# Supplementary material
Source: PubMed Central journal article supplement (PMC3285397)
Supplement: NIHMS339415-supplement-4.pdf [file NIHMS339415-supplement-4.pdf]

## **SUPPLEMENTARY FIGURE CAPTIONS**

Figure 1e: Graphic representation of AUC value

Figure 2e: Scatter plots demonstrating the relationship between total positioning error and its components, prostate bed displacement relative to bony anatomy and setup error.
